# Supplementary material
Source: Springer Nature journal article supplement (https://www.springermedizin.de/resource/supplementary/13012_2009_264_MOESM1_ESM.pdf/9629588)
Supplement: MOESM1 [file 9629588]

| Methods                              | Outcome measures                                                                                                                                                                                                                                                                                                                                                                                                                                                                                                                                                                                                                                               | Analysis of incidents                                                                                                                                                                                                                                                                                                                                                                                                                                    |
|--------------------------------------|----------------------------------------------------------------------------------------------------------------------------------------------------------------------------------------------------------------------------------------------------------------------------------------------------------------------------------------------------------------------------------------------------------------------------------------------------------------------------------------------------------------------------------------------------------------------------------------------------------------------------------------------------------------|----------------------------------------------------------------------------------------------------------------------------------------------------------------------------------------------------------------------------------------------------------------------------------------------------------------------------------------------------------------------------------------------------------------------------------------------------------|
| Retrospective chart audit            | <ul style="list-style-type: none"> <li>• Practice type</li> <li>• Patient sex</li> <li>• Patient age (category)</li> <li>• Social status patient</li> <li>• Recording of possible communication problems</li> <li>• Patient at risk</li> <li>• Number of contacts in study year</li> <li>• Urgency of the question for help</li> <li>• Having had more than one caretaker in the same practice</li> <li>• Having had more than one caretaker outside the practice for the same health problem</li> <li>• Accuracy of record keeping</li> <li>• Whether or not incident</li> <li>• Description of the incident</li> <li>• Action(s) taken afterwards</li> </ul> | <ul style="list-style-type: none"> <li>• Type of incident (organisation, communication, prevention, triage, diagnostics, treatment)</li> <li>• Cause (e.g. technical; by means of the PRISMA method)</li> <li>• Actual harm (e.g. death; by means of the 'severity of outcome' domain of the International Taxonomy of Medical Errors in Primary Care)</li> <li>• Probability of severe harm or death (most probable, probable, not probable)</li> </ul> |
| Prospective incident reporting study | <ul style="list-style-type: none"> <li>• Information about the reporting person (e.g. function)</li> <li>• Patient year of birth</li> <li>• Patient sex</li> <li>• Description of the incident</li> <li>• Action(s) taken afterwards</li> <li>• Possible consequences incident</li> <li>• Suggestions how to prevent future incidents like these</li> </ul>                                                                                                                                                                                                                                                                                                    |                                                                                                                                                                                                                                                                                                                                                                                                                                                          |
| Practice survey                      | <ul style="list-style-type: none"> <li>• Practice characteristics (practice type, number of health professionals in the practice, percentage of patients &gt;75 years, percentage of patients with a low social status, mean number of hours of patient contacts and management tasks per week, and whether the practice has an educational function)</li> <li>• Topics related to quality and safety management (e.g. existence of hygiene protocols, and information on out-of hours access to the practice)</li> <li>• Safety culture of the practice (e.g. follow-up of incidents, and priority of safety within the practice)</li> </ul>                  |                                                                                                                                                                                                                                                                                                                                                                                                                                                          |
